# Supplementary material for: First insights into the protonation of dissymetrically disubstituted di-iron azadithiolate models of the [FeFe]H2ases active site
Source: Royal Society of Chemistry journal article supplement (doi:10.1039/b801373j), 2008-01-01
Supplement: b801373j.pdf [file b801373j.pdf]

## Synthesis of 2

1.384 g of  $[\text{Fe}_2\{\mu\text{-SCH}_2\text{N}(\text{iPr})\text{CH}_2\text{S}\}(\text{CO})_6]$  was heated in refluxing toluene with 2 eq of 1,10-phenanthroline monohydrate (1.163 g) until gas evolution stopped. After filtration, the solvent was removed *in vacuo* and the product was purified by column chromatography on silica gel with  $\text{CH}_2\text{Cl}_2$  as eluent and washed with pentane. Suitable single crystals for X-Ray diffraction were grown at room temperature from hexane/ $\text{CH}_2\text{Cl}_2$  solution. Yield : 0.378 g, 22 %. IR ( $\text{CH}_2\text{Cl}_2$ ) :  $\nu_{\text{CO}}$  2008, 1938, 1895  $\text{cm}^{-1}$ , RMN  $^1\text{H}$  : (300 MHz,  $\text{CD}_2\text{Cl}_2$ ) : 9.00 (d, 2H,  $J_{\text{HH}} = 4.3$  Hz, phen), 8.24 (d, 2H,  $J_{\text{HH}} = 6.8$  Hz, phen), 7.89 (s, 2H, phen), 7.60 (dd, 2H,  $J_{\text{HH}} = 5.5$  Hz,  $J_{\text{HH}} = 6.2$  Hz, phen), 3.33 (d, 2H,  $J_{\text{HH}} = 11$  Hz,  $\text{N}(\text{CH}_2)_2\text{S}_2$ ), 2.88 (spt, 1H,  $J_{\text{HH}} = 6.5$  Hz,  $\text{NCH}(\text{CH}_3)_2$ ), 2.76 (d, 2H,  $J_{\text{HH}} = 11$  Hz,  $\text{N}(\text{CH}_2)_2\text{S}_2$ ), 0.95 (d, 6H,  $J_{\text{HH}} = 6.6$  Hz,  $\text{NCH}(\text{CH}_3)_2$ ) ; RMN  $^{13}\text{C}\{^1\text{H}\}$  (300 MHz,  $\text{CD}_2\text{Cl}_2$ ) : 217.2 (s, CO), 214.4 (s, CO), {151.1, 148.0, 132.8, 130.0, 127.0, 122.7} (phen), 18.9 (s,  $\text{NCH}(\text{CH}_3)_2$ ), 50.3 (s,  $\text{N}(\text{CH}_2)_2\text{S}_2$ ), 56.5 (s,  $\text{NCH}(\text{CH}_3)_2$ )

**Table 1**

| Isomer <b>a</b> ( $\approx 70\%$ )                                             | Isomer <b>b</b> ( $\approx 30\%$ )                                             |
|--------------------------------------------------------------------------------|--------------------------------------------------------------------------------|
| 8.94 (d, 2H, $J_{\text{HH}} = 5.2$ Hz ,phen)                                   | 8.91 (d, 2H, $J_{\text{HH}} = 4.8$ Hz ,phen)                                   |
| 8.69 (d, 2H, $J_{\text{HH}} = 8.1$ Hz ,phen)                                   | 8.69 (d, 2H, $J_{\text{HH}} = 8.1$ Hz ,phen)                                   |
| 8.22 (s, 2H, phen)                                                             | 8.22 (s, 2H, phen)                                                             |
| 7.93 (dd, 2H, nr, phen)                                                        | 7.93 (dd, 2H, nr, phen)                                                        |
| 4.25 (d, 2H, $J_{\text{HH}} = 12.0$ Hz , $\text{N}(\text{CH}_2)_2\text{S}_2$ ) | 4.43 (d, 2H, $J_{\text{HH}} = 12.2$ Hz , $\text{N}(\text{CH}_2)_2\text{S}_2$ ) |
| 3.96 (spt, 1H, $J_{\text{HH}} = 6.7$ Hz, $\text{NCH}(\text{CH}_3)_2$ )         | 3.96 (spt, 1H, $J_{\text{HH}} = 6.7$ Hz, $\text{NCH}(\text{CH}_3)_2$ )         |
| 3.12 (d, 2H, $J_{\text{HH}} = 12.0$ Hz , $\text{N}(\text{CH}_2)_2\text{S}_2$ ) | 3.34 (d, 2H, $J_{\text{HH}} = 12.2$ Hz , $\text{N}(\text{CH}_2)_2\text{S}_2$ ) |
| 1.49 (d, 6H, $J_{\text{HH}} = 6.85$ Hz, $\text{NCH}(\text{CH}_3)_2$ )          | 1.48 (d, 6H, $J_{\text{HH}} = 6.6$ Hz, $\text{NCH}(\text{CH}_3)_2$ )           |

**Figure a**

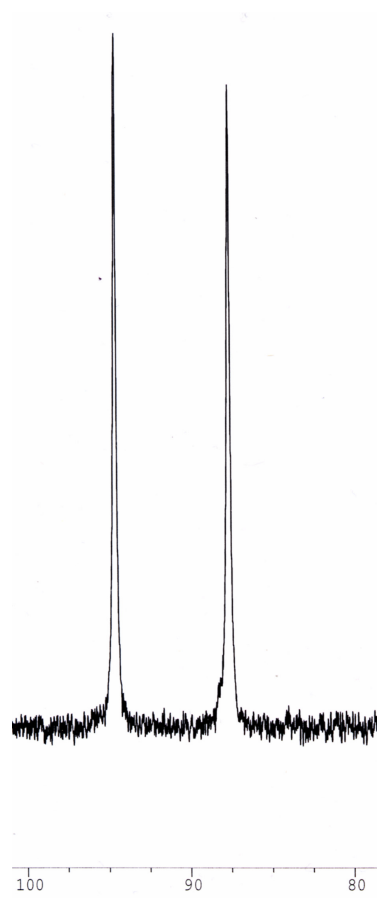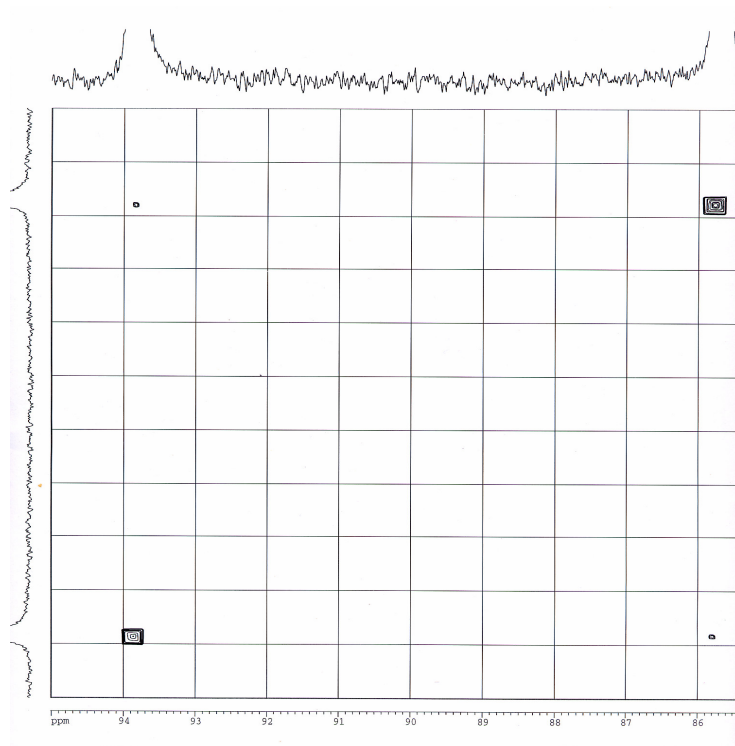

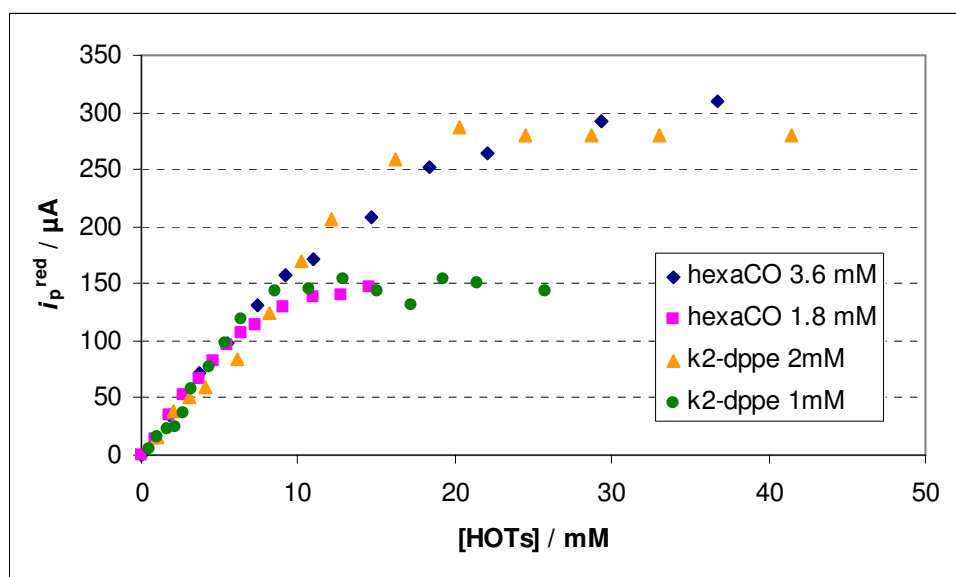

**Figure b** : Acid-dependence of the reduction current for  $[\text{Fe}_2(\text{CO})_4(\kappa^2\text{-dppe})\{\mu\text{-SCH}_2\text{N}(\text{iPr})\text{CH}_2\text{S}\}]$  (**1**) and for  $[\text{Fe}_2(\text{CO})_6\{\mu\text{-SCH}_2\text{N}(\text{iPr})\text{CH}_2\text{S}\}]$ ; the concentrations of complex (k2-dppe = **1** and hexaCO =  $[\text{Fe}_2(\text{CO})_6\{\mu\text{-SCH}_2\text{N}(\text{iPr})\text{CH}_2\text{S}\}]$ ) are indicated on the diagram; the currents ( $i_p^{\text{red}}$ ) were measured by cyclic voltammetry at a scan rate of  $0.2 \text{ V s}^{-1}$  at the peak potential of process A for both complexes; the data for  $[\text{Fe}_2(\text{CO})_6\{\mu\text{-SCH}_2\text{N}(\text{iPr})\text{CH}_2\text{S}\}]$  were taken from reference 24.
